# Supplementary material
Source: publisher figshare collection journal article supplement (https://geolsoc.figshare.com/articles/dataset/_/3453593)
Supplement: Supplementary file 1 [file 1]

**Table C.** U-Th-Pb SHRIMP-RG analytical data for zircons from the migmatites from the Ceret stock contact aureole (sample 529).

| Spot Name  | Description <sup>(a)</sup> | Common<br><sup>206</sup> Pb (%) <sup>(b)</sup> | U<br>(ppm) | Th<br>(ppm) | <sup>232</sup> Th/<br><sup>238</sup> U | "Ages" <sup>(d)</sup> (d) | Uncorrected ratios                                 |                                                     | <sup>204</sup> Pb Corrected ratios                      |                                                           |                                                         |                                                         | error<br>correlation |
|------------|----------------------------|------------------------------------------------|------------|-------------|----------------------------------------|---------------------------|----------------------------------------------------|-----------------------------------------------------|---------------------------------------------------------|-----------------------------------------------------------|---------------------------------------------------------|---------------------------------------------------------|----------------------|
|            |                            |                                                |            |             |                                        |                           | <sup>238</sup> U/ <sup>206</sup> Pb <sup>(e)</sup> | <sup>207</sup> Pb/ <sup>206</sup> Pb <sup>(e)</sup> | <sup>238</sup> U/ <sup>206</sup> Pb* <sup>(c)</sup> (e) | <sup>207</sup> Pb*/ <sup>206</sup> Pb* <sup>(c)</sup> (e) | <sup>207</sup> Pb*/ <sup>235</sup> U <sup>(c)</sup> (e) | <sup>206</sup> Pb*/ <sup>238</sup> U <sup>(c)</sup> (e) |                      |
| <b>529</b> |                            |                                                |            |             |                                        |                           |                                                    |                                                     |                                                         |                                                           |                                                         |                                                         |                      |
| 11         | r. inher                   | -0.20                                          | 331        | 35          | 0.11                                   | 567.3 ± 8.8               | 10.89 ± 1.6                                        | 0.0574 ± 2.1                                        | 10.90 ± 1.6                                             | 0.0569 ± 2.2                                              | 0.72 ± 2.7                                              | 0.0918 ± 1.6                                            | 0.5907               |
| 1          | r. inher                   | 0.08                                           | 152        | 63          | 0.43                                   | 579.4 ± 9.6               | 10.62 ± 1.7                                        | 0.0600 ± 2.2                                        | 10.62 ± 1.7                                             | 0.0600 ± 2.2                                              | 0.78 ± 2.7                                              | 0.0941 ± 1.7                                            | 0.6193               |
| 16         | r. inher                   | 0.31                                           | 124        | 35          | 0.29                                   | 786.0 ± 13.4              | 7.69 ± 1.8                                         | 0.0680 ± 2.1                                        | 7.69 ± 1.8                                              | 0.0680 ± 2.1                                              | 1.22 ± 2.7                                              | 0.1301 ± 1.8                                            | 0.6496               |
| 6          | r. inher                   | -0.04                                          | 186        | 88          | 0.49                                   | 915.1 ± 15.3              | 6.56 ± 1.7                                         | 0.0692 ± 1.6                                        | 6.56 ± 1.7                                              | 0.0687 ± 1.7                                              | 1.44 ± 2.4                                              | 0.1524 ± 1.7                                            | 0.7118               |
| 12         | r. inher                   | 0.03                                           | 189        | 155         | 0.85                                   | 1311 ± 23                 | 4.39 ± 1.6                                         | 0.0855 ± 1.1                                        | 4.40 ± 1.6                                              | 0.0848 ± 1.2                                              | 2.66 ± 2.0                                              | 0.2275 ± 1.6                                            | 0.8114               |
| 4          | r. inher                   | 0.66                                           | 318        | 298         | 0.97                                   | 1769 ± 13                 | 3.35 ± 1.5                                         | 0.1085 ± 0.7                                        | 3.35 ± 1.5                                              | 0.1082 ± 0.7                                              | 4.45 ± 1.7                                              | 0.2986 ± 1.5                                            | 0.9104               |
| 15         | r. inher                   | 0.20                                           | 156        | 111         | 0.74                                   | 1868 ± 83                 | 3.00 ± 1.7                                         | 0.1149 ± 4.5                                        | 3.00 ± 1.7                                              | 0.1142 ± 4.6                                              | 5.24 ± 4.9                                              | 0.3330 ± 1.7                                            | 0.3531               |
| 3          | r. inher                   | 0.17                                           | 72         | 64          | 0.91                                   | 1873 ± 54                 | 3.02 ± 2.0                                         | 0.1140 ± 3.0                                        | 3.02 ± 2.0                                              | 0.1146 ± 3.0                                              | 5.23 ± 3.6                                              | 0.3313 ± 2.0                                            | 0.5436               |
| 9          | r. inher                   | 0.51                                           | 36         | 33          | 0.94                                   | 2057 ± 78                 | 2.71 ± 2.2                                         | 0.1286 ± 4.3                                        | 2.71 ± 2.2                                              | 0.1270 ± 4.4                                              | 6.46 ± 4.9                                              | 0.3686 ± 2.2                                            | 0.4380               |
| 17         | HcPb                       | 2.61                                           | 334        | 68          | 0.21                                   | 2120 ± 10                 | 3.06 ± 1.5                                         | 0.1317 ± 0.6                                        | 3.06 ± 1.5                                              | 0.1317 ± 0.6                                              | 5.94 ± 1.6                                              | 0.3269 ± 1.5                                            | 0.9344               |
| 18         | r. inher                   | 0.05                                           | 428        | 121         | 0.29                                   | 2158 ± 13                 | 2.52 ± 1.5                                         | 0.1346 ± 0.7                                        | 2.52 ± 1.5                                              | 0.1345 ± 0.7                                              | 7.36 ± 1.7                                              | 0.3968 ± 1.5                                            | 0.8993               |
| 10         | r. inher                   | 1.43                                           | 143        | 219         | 1.57                                   | 2171 ± 37                 | 2.71 ± 1.7                                         | 0.1357 ± 2.1                                        | 2.71 ± 1.7                                              | 0.1355 ± 2.1                                              | 6.90 ± 2.7                                              | 0.3694 ± 1.7                                            | 0.6263               |
| 14         | r. inher                   | 0.03                                           | 69         | 0.66        | 0.99                                   | 2272 ± 31                 | 2.36 ± 2.0                                         | 0.1440 ± 1.8                                        | 2.37 ± 2.0                                              | 0.1437 ± 1.8                                              | 8.37 ± 2.7                                              | 0.4227 ± 2.0                                            | 0.7416               |
| 2          | HcPb                       | 2.05                                           | 153        | 96          | 0.64                                   | 2382 ± 83                 | 2.45 ± 1.7                                         | 0.1535 ± 4.9                                        | 2.45 ± 1.7                                              | 0.1532 ± 4.9                                              | 8.62 ± 5.2                                              | 0.4083 ± 1.7                                            | 0.3245               |
| 8          | r. inher                   | 1.34                                           | 37         | 18          | 0.52                                   | 2553 ± 22                 | 2.15 ± 2.3                                         | 0.1703 ± 1.3                                        | 2.15 ± 2.3                                              | 0.1695 ± 1.3                                              | 10.88 ± 2.6                                             | 0.4656 ± 2.3                                            | 0.8715               |
| 13         | r. inher                   | 0.92                                           | 115        | 94          | 0.85                                   | 2572 ± 44                 | 2.10 ± 1.7                                         | 0.1717 ± 2.6                                        | 2.10 ± 1.7                                              | 0.1715 ± 2.6                                              | 11.26 ± 3.1                                             | 0.4762 ± 1.7                                            | 0.5442               |
| 5          | HcPb                       | 2.41                                           | 493        | 191         | 0.40                                   | 2616 ± 12                 | 2.16 ± 1.5                                         | 0.1762 ± 0.7                                        | 2.16 ± 1.5                                              | 0.1761 ± 0.7                                              | 11.22 ± 1.7                                             | 0.4621 ± 1.5                                            | 0.9031               |
| 7          | r. inher                   | 1.37                                           | 189        | 338         | 1.85                                   | 2702 ± 9                  | 1.99 ± 1.7                                         | 0.1856 ± 0.6                                        | 1.99 ± 1.7                                              | 0.1854 ± 0.6                                              | 12.82 ± 1.7                                             | 0.5014 ± 1.7                                            | 0.9467               |

<sup>a</sup> Zircon characterization: r=rim; inher= inheritance; HcPb= high common Pb.

<sup>b</sup> Negative values denote reversely discordant analyses.

<sup>c</sup> Pb\* denotes radiogenic lead.

<sup>d</sup> Errors are 1σ (absolute values).

<sup>e</sup> Errors are expressed in percentage (%).

"Age <1000 Ma are based on <sup>207</sup>Pb corrected <sup>206</sup>Pb/<sup>238</sup>U ratios. whereas ages >1000 Ma are calculated from <sup>204</sup>Pb corrected <sup>206</sup>Pb/<sup>207</sup>Pb ratios".
