# Supplementary material
Source: publisher figshare collection journal article supplement (https://geolsoc.figshare.com/articles/dataset/_/3453593)
Supplement: Supplementary file 2 [file 1]

**Table A. U-Th-Pb SHRIMP-RG analytical data for zircons from the lowermost migmatites (samples 349 and 524).**

| Spot Name  | Description <sup>(a)</sup> | Common<br><sup>206</sup> Pb (%) <sup>(b)</sup> | U<br>(ppm) | Th<br>(ppm) | <sup>232</sup> Th/ <sup>238</sup> U | "Age" <sup>(c)</sup> (d) | Uncorrected ratios                                 |                                                     | <sup>206</sup> Pb Corrected ratios                     |                                                          |                                                         |                                                         | error<br>correlation |
|------------|----------------------------|------------------------------------------------|------------|-------------|-------------------------------------|--------------------------|----------------------------------------------------|-----------------------------------------------------|--------------------------------------------------------|----------------------------------------------------------|---------------------------------------------------------|---------------------------------------------------------|----------------------|
|            |                            |                                                |            |             |                                     |                          | <sup>238</sup> U/ <sup>206</sup> Pb <sup>(e)</sup> | <sup>207</sup> Pb/ <sup>206</sup> Pb <sup>(e)</sup> | <sup>238</sup> U/ <sup>206</sup> Pb <sup>(c)</sup> (e) | <sup>207</sup> Pb*/ <sup>206</sup> Pb <sup>(c)</sup> (e) | <sup>207</sup> Pb*/ <sup>235</sup> U <sup>(c)</sup> (e) | <sup>206</sup> Pb*/ <sup>238</sup> U <sup>(c)</sup> (e) |                      |
| <b>349</b> |                            |                                                |            |             |                                     |                          |                                                    |                                                     |                                                        |                                                          |                                                         |                                                         |                      |
| 11         | r                          | 0.04                                           | 1267       | 9           | 0.01                                | <b>307.2 ± 1.1</b>       | 20.48 ± 0.4                                        | 0.0529 ± 1.1                                        | 20.48 ± 0.4                                            | 0.0526 ± 1.1                                             | 0.35 ± 1.2                                              | 0.0488 ± 0.4                                            | 0.3043               |
| 4          | r                          | -0.01                                          | 1234       | 5           | 0.00                                | <b>309.2 ± 1.2</b>       | 20.36 ± 0.4                                        | 0.0525 ± 1.2                                        | 20.37 ± 0.4                                            | 0.0521 ± 1.3                                             | 0.35 ± 1.3                                              | 0.0491 ± 0.4                                            | 0.2946               |
| 29         | r                          | 0.02                                           | 931        | 5           | 0.01                                | <b>316.0 ± 1.3</b>       | 19.90 ± 0.4                                        | 0.0529 ± 1.3                                        | 19.96 ± 0.4                                            | 0.0507 ± 1.9                                             | 0.35 ± 1.9                                              | 0.0501 ± 0.4                                            | 0.2197               |
| 20         | r                          | 1.04                                           | 294        | 3           | 0.01                                | <b>322.5 ± 2.5</b>       | 19.29 ± 0.8                                        | 0.0612 ± 2.1                                        | 19.61 ± 0.9                                            | 0.0480 ± 7.3                                             | 0.34 ± 7.4                                              | 0.0510 ± 0.9                                            | 0.1177               |
| 13         | HcPb                       | 2.24                                           | 1084       | 9           | 0.01                                | <b>325.8 ± 1.9</b>       | 18.86 ± 0.4                                        | 0.0710 ± 4.7                                        | 19.33 ± 0.5                                            | 0.0512 ± 8.3                                             | 0.36 ± 8.3                                              | 0.0517 ± 0.5                                            | 0.0608               |
| 30         | r                          | 1.33                                           | 389        | 47          | 0.12                                | <b>338.2 ± 2.1</b>       | 18.32 ± 0.6                                        | 0.0639 ± 1.6                                        | 18.70 ± 0.7                                            | 0.0471 ± 6.6                                             | 0.35 ± 6.7                                              | 0.0535 ± 0.7                                            | 0.1069               |
| 32         | r                          | 0.21                                           | 440        | 5           | 0.01                                | <b>369.6 ± 2.6</b>       | 16.91 ± 0.7                                        | 0.0556 ± 2.2                                        | 17.11 ± 0.8                                            | 0.0461 ± 6.6                                             | 0.37 ± 6.6                                              | 0.0584 ± 0.8                                            | 0.1187               |
| 15         | HcPb                       | 6.30                                           | 570        | 14          | 0.03                                | 416.9 ± 2.3              | 14.02 ± 0.5                                        | 0.1061 ± 1.1                                        | 14.24 ± 0.6                                            | 0.0945 ± 2.5                                             | 0.92 ± 2.6                                              | 0.0702 ± 0.6                                            | 0.2290               |
| 28         | r, inher                   | -0.12                                          | 331        | 60          | 0.19                                | 607.5 ± 3.6              | 10.13 ± 0.6                                        | 0.0591 ± 1.4                                        | 10.14 ± 0.6                                            | 0.0581 ± 1.7                                             | 0.79 ± 1.8                                              | 0.0986 ± 0.6                                            | 0.3362               |
| 1          | r, inher                   | 0.08                                           | 703        | 50          | 0.07                                | 636.1 ± 2.5              | 9.64 ± 0.4                                         | 0.0615 ± 1.1                                        | 9.64 ± 0.4                                             | 0.0609 ± 1.2                                             | 0.87 ± 1.3                                              | 0.1037 ± 0.4                                            | 0.3194               |
| 14         | r, inher                   | 0.07                                           | 1004       | 56          | 0.06                                | 654.2 ± 2.2              | 9.35 ± 0.3                                         | 0.0620 ± 0.8                                        | 9.36 ± 0.3                                             | 0.0614 ± 0.9                                             | 0.90 ± 1.0                                              | 0.1068 ± 0.3                                            | 0.3461               |
| 7          | r, inher                   | 0.01                                           | 828        | 357         | 0.45                                | 787.1 ± 2.7              | 7.70 ± 0.3                                         | 0.0654 ± 0.7                                        | 7.70 ± 0.3                                             | 0.0652 ± 0.7                                             | 1.17 ± 0.8                                              | 0.1298 ± 0.3                                            | 0.4263               |
| 10         | r, inher                   | -0.19                                          | 671        | 48          | 0.07                                | 819.3 ± 3.4              | 7.39 ± 0.4                                         | 0.0648 ± 0.9                                        | 7.40 ± 0.4                                             | 0.0644 ± 0.9                                             | 1.20 ± 1.0                                              | 0.1352 ± 0.4                                            | 0.4197               |
| 24         | HcPb                       | 2.02                                           | 264        | 29          | 0.11                                | 834.7 ± 6.0              | 7.09 ± 0.7                                         | 0.0836 ± 1.2                                        | 7.23 ± 0.8                                             | 0.0671 ± 4.6                                             | 1.28 ± 4.6                                              | 0.1383 ± 0.8                                            | 0.1762               |
| 23         | r, inher                   | -0.20                                          | 395        | 57          | 0.15                                | 897.6 ± 3.2              | 5.80 ± 0.6                                         | 0.0718 ± 1.0                                        | 5.82 ± 0.6                                             | 0.0690 ± 1.6                                             | 1.63 ± 1.7                                              | 0.1718 ± 0.6                                            | 0.3384               |
| 2          | r, inher                   | 0.13                                           | 234        | 77          | 0.34                                | 919.9 ± 5.6              | 6.51 ± 0.6                                         | 0.0708 ± 1.2                                        | 6.51 ± 0.6                                             | 0.0708 ± 1.2                                             | 1.50 ± 1.4                                              | 0.1536 ± 0.6                                            | 0.4484               |
| 16         | r, inher                   | 0.03                                           | 166        | 51          | 0.32                                | 921.3 ± 7.9              | 6.51 ± 0.9                                         | 0.0700 ± 1.5                                        | 6.51 ± 0.9                                             | 0.0694 ± 1.5                                             | 1.47 ± 1.8                                              | 0.1536 ± 0.9                                            | 0.4969               |
| 8          | r, inher                   | 0.15                                           | 803        | 26          | 0.03                                | 924.8 ± 3.6              | 6.47 ± 0.4                                         | 0.0711 ± 0.8                                        | 6.47 ± 0.4                                             | 0.0709 ± 0.8                                             | 1.51 ± 0.9                                              | 0.1544 ± 0.4                                            | 0.4323               |
| 27         | r, inher                   | 1.98                                           | 926        | 78          | 0.09                                | 949.5 ± 2.6              | 6.18 ± 0.3                                         | 0.0873 ± 0.8                                        | 6.18 ± 0.3                                             | 0.0871 ± 0.9                                             | 1.94 ± 0.9                                              | 0.1619 ± 0.3                                            | 0.2914               |
| 12         | r, inher                   | -0.11                                          | 934        | 72          | 0.08                                | 952.2 ± 3.2              | 6.29 ± 0.3                                         | 0.0699 ± 0.6                                        | 6.29 ± 0.3                                             | 0.0698 ± 0.6                                             | 1.53 ± 0.7                                              | 0.1590 ± 0.3                                            | 0.4675               |
| 27.2       | r, inher                   | -0.02                                          | 1487       | 120         | 0.08                                | 959.0 ± 2.4              | 6.24 ± 0.3                                         | 0.0709 ± 0.5                                        | 6.24 ± 0.3                                             | 0.0708 ± 0.5                                             | 1.57 ± 0.5                                              | 0.1604 ± 0.3                                            | 0.4647               |
| 22         | r, inher                   | -0.16                                          | 241        | 143         | 0.61                                | 961.8 ± 5.9              | 6.22 ± 0.6                                         | 0.0698 ± 1.2                                        | 6.23 ± 0.6                                             | 0.0691 ± 1.3                                             | 1.53 ± 1.5                                              | 0.1605 ± 0.6                                            | 0.4291               |
| 26         | r, inher                   | -0.02                                          | 1250       | 23          | 0.02                                | 967.5 ± 2.5              | 6.18 ± 0.3                                         | 0.0712 ± 0.5                                        | 6.18 ± 0.3                                             | 0.0710 ± 0.6                                             | 1.58 ± 0.6                                              | 0.1619 ± 0.3                                            | 0.4249               |
| 3          | r, inher                   | -0.06                                          | 462        | 207         | 0.46                                | 995.1 ± 4.5              | 5.99 ± 0.5                                         | 0.0718 ± 0.8                                        | 6.00 ± 0.5                                             | 0.0717 ± 0.8                                             | 1.65 ± 1.0                                              | 0.1668 ± 0.5                                            | 0.4781               |
| 19         | r, inher                   | 0.09                                           | 581        | 28          | 0.05                                | 1015 ± 20                | 5.87 ± 0.4                                         | 0.0737 ± 0.9                                        | 5.87 ± 0.4                                             | 0.0731 ± 1.0                                             | 1.71 ± 1.1                                              | 0.1702 ± 0.4                                            | 0.3586               |
| 17         | r, inher                   | 0.27                                           | 1171       | 41          | 0.04                                | 1070 ± 10                | 5.87 ± 0.3                                         | 0.0752 ± 0.5                                        | 5.87 ± 0.3                                             | 0.0751 ± 0.5                                             | 1.76 ± 0.6                                              | 0.1704 ± 0.3                                            | 0.5405               |
| 18         | r, inher                   | 0.67                                           | 906        | 992         | 1.13                                | 2114 ± 6                 | 2.67 ± 0.3                                         | 0.1315 ± 0.3                                        | 2.67 ± 0.3                                             | 0.1312 ± 0.3                                             | 6.77 ± 0.4                                              | 0.3741 ± 0.3                                            | 0.6839               |
| 31         | HcPb                       | 8.17                                           | 328        | 135         | 0.42                                | 2293 ± 16                | 4.50 ± 0.6                                         | 0.1489 ± 1.7                                        | 4.52 ± 0.6                                             | 0.1454 ± 0.9                                             | 4.43 ± 1.1                                              | 0.2210 ± 0.6                                            | 0.5792               |
| 33         | HcPb                       | 8.07                                           | 556        | 13          | 0.02                                | 2296 ± 33                | 4.15 ± 0.5                                         | 0.1523 ± 0.5                                        | 4.19 ± 0.5                                             | 0.1456 ± 1.9                                             | 4.79 ± 2.0                                              | 0.2387 ± 0.5                                            | 0.2662               |
| 25         | HcPb                       | 7.31                                           | 168        | 39          | 0.24                                | 2322 ± 21                | 3.93 ± 1.0                                         | 0.1495 ± 1.1                                        | 3.94 ± 1.0                                             | 0.1480 ± 1.2                                             | 5.18 ± 1.6                                              | 0.2540 ± 1.0                                            | 0.6253               |
| 21         | HcPb                       | 4.67                                           | 245        | 86          | 0.36                                | 2412 ± 14                | 2.76 ± 0.5                                         | 0.1578 ± 0.8                                        | 2.77 ± 0.5                                             | 0.1559 ± 0.8                                             | 7.76 ± 1.0                                              | 0.3611 ± 0.5                                            | 0.5001               |
| 5          | HcPb                       | 3.26                                           | 581        | 261         | 0.47                                | 2429 ± 6                 | 2.53 ± 0.4                                         | 0.1578 ± 0.4                                        | 2.53 ± 0.4                                             | 0.1575 ± 0.4                                             | 8.57 ± 0.5                                              | 0.3947 ± 0.4                                            | 0.7278               |
| 35         | r, inher                   | 0.71                                           | 247        | 133         | 0.56                                | 2466 ± 8                 | 2.20 ± 0.6                                         | 0.1612 ± 0.5                                        | 2.20 ± 0.6                                             | 0.1610 ± 0.5                                             | 10.08 ± 0.8                                             | 0.4543 ± 0.6                                            | 0.7455               |
| 6          | HcPb                       | 2.15                                           | 1252       | 379         | 0.31                                | 2469 ± 4                 | 2.34 ± 0.3                                         | 0.1614 ± 0.2                                        | 2.34 ± 0.3                                             | 0.1613 ± 0.2                                             | 9.52 ± 0.4                                              | 0.4281 ± 0.3                                            | 0.7903               |
| 36         | HcPb                       | 5.77                                           | 621        | 59          | 0.10                                | 2476 ± 6                 | 2.86 ± 0.3                                         | 0.1625 ± 0.3                                        | 2.86 ± 0.3                                             | 0.1620 ± 0.3                                             | 7.80 ± 0.4                                              | 0.3493 ± 0.3                                            | 0.6675               |
| 9          | r, inher                   | 0.19                                           | 330        | 181         | 0.57                                | 2491 ± 7                 | 2.13 ± 0.5                                         | 0.1634 ± 0.4                                        | 2.13 ± 0.5                                             | 0.1633 ± 0.4                                             | 10.55 ± 0.6                                             | 0.4686 ± 0.5                                            | 0.7649               |
| 34         | r, inher                   | -0.19                                          | 1144       | 340         | 0.31                                | 2737 ± 5                 | 1.88 ± 0.3                                         | 0.1895 ± 0.3                                        | 1.88 ± 0.3                                             | 0.1894 ± 0.3                                             | 13.88 ± 0.4                                             | 0.5315 ± 0.3                                            | 0.6594               |
| <b>524</b> |                            |                                                |            |             |                                     |                          |                                                    |                                                     |                                                        |                                                          |                                                         |                                                         |                      |
| 9.2        | r                          | 0.02                                           | 341        | 8           | 0.03                                | <b>287.5 ± 1.8</b>       | 21.92 ± 0.6                                        | 0.0522 ± 1.9                                        | 21.95 ± 0.6                                            | 0.0509 ± 2.4                                             | 0.32 ± 2.5                                              | 0.0455 ± 0.6                                            | 0.2613               |
| 5          | r                          | 0.12                                           | 799        | 7           | 0.01                                | <b>304.1 ± 1.3</b>       | 20.68 ± 0.4                                        | 0.0534 ± 1.3                                        | 20.70 ± 0.4                                            | 0.0525 ± 1.5                                             | 0.35 ± 1.6                                              | 0.0483 ± 0.4                                            | 0.2746               |
| 18.1       | r                          | 0.10                                           | 484        | 7           | 0.02                                | <b>308.6 ± 3.8</b>       | 20.37 ± 1.2                                        | 0.0533 ± 1.7                                        | 20.41 ± 1.2                                            | 0.0518 ± 2.3                                             | 0.35 ± 2.6                                              | 0.0490 ± 1.2                                            | 0.4778               |
| 7          | r                          | -0.16                                          | 811        | 12          | 0.02                                | <b>312.7 ± 1.7</b>       | 20.15 ± 0.5                                        | 0.0513 ± 1.4                                        | 20.15 ± 0.5                                            | 0.0514 ± 1.4                                             | 0.35 ± 1.5                                              | 0.0496 ± 0.5                                            | 0.3564               |
| 5.2        | r                          | 0.04                                           | 851        | 9           | 0.01                                | <b>314.4 ± 1.5</b>       | 20.00 ± 0.5                                        | 0.0530 ± 1.4                                        | 20.00 ± 0.5                                            | 0.0530 ± 1.4                                             | 0.37 ± 1.4                                              | 0.0500 ± 0.5                                            | 0.3215               |
| 17         | r                          | -0.24                                          | 1199       | 8           | 0.01                                | <b>316.4 ± 1.2</b>       | 19.93 ± 0.4                                        | 0.0508 ± 1.1                                        | 19.91 ± 0.4                                            | 0.0516 ± 1.3                                             | 0.36 ± 1.4                                              | 0.0502 ± 0.4                                            | 0.2754               |
| 12         | r                          | 0.33                                           | 769        | 12          | 0.02                                | <b>339.6 ± 1.7</b>       | 18.43 ± 0.5                                        | 0.0559 ± 1.3                                        | 18.45 ± 0.5                                            | 0.0548 ± 1.6                                             | 0.41 ± 1.7                                              | 0.0542 ± 0.5                                            | 0.3063               |
| 18.2       | HcPb                       | 7.74                                           | 700        | 10          | 0.01                                | 649.2 ± 3.9              | 8.71 ± 0.5                                         | 0.1247 ± 2.4                                        | 8.71 ± 0.5                                             | 0.1244 ± 2.4                                             | 1.97 ± 2.5                                              | 0.1148 ± 0.5                                            | 0.1860               |
| 20         | r, inher                   | 0.08                                           | 2125       | 414         | 0.20                                | 718.1 ± 1.5              | 8.48 ± 0.2                                         | 0.0639 ± 0.4                                        | 8.48 ± 0.2                                             | 0.0638 ± 0.4                                             | 1.04 ± 0.5                                              | 0.1179 ± 0.2                                            | 0.4556               |
| 16         | r, inher                   | 1.01                                           | 483        | 68          | 0.15                                | 813.7 ± 4.3              | 7.36 ± 0.5                                         | 0.0746 ± 1.5                                        | 7.42 ± 0.5                                             | 0.0680 ± 2.2                                             | 1.26 ± 2.3                                              | 0.1348 ± 0.5                                            | 0.2394               |
| 11         | r, inher                   | 0.06                                           | 118        | 52          | 0.46                                | 882.1 ± 8.1              | 6.81 ± 0.9                                         | 0.0690 ± 1.8                                        | 6.82 ± 0.9                                             | 0.0683 ± 1.9                                             | 1.38 ± 2.1                                              | 0.1466 ± 0.9                                            | 0.4351               |
| 10         | r, inher                   | 0.12                                           | 1348       | 97          | 0.07                                | 910.3 ± 2.7              | 6.59 ± 0.3                                         | 0.0704 ± 0.8                                        | 6.59 ± 0.3                                             | 0.0703 ± 0.8                                             | 1.47 ± 0.9                                              | 0.1518 ± 0.3                                            | 0.3440               |
| 4          | r, inher                   | -0.20                                          | 2100       | 28          | 0.01                                | 970.8 ± 2.2              | 6.17 ± 0.2                                         | 0.0698 ± 0.9                                        | 6.17 ± 0.2                                             | 0.0697 ± 0.9                                             | 1.56 ± 0.9                                              | 0.1622 ± 0.2                                            | 0.2553               |
| 12.2       | r, inher                   | -0.26                                          | 954        | 91          | 0.10                                | 980.7 ± 3.3              | 6.10 ± 0.3                                         | 0.0696 ± 1.2                                        | 6.10 ± 0.3                                             | 0.0694 ± 1.2                                             | 1.57 ± 1.3                                              | 0.1638 ± 0.3                                            | 0.2687               |
| 3          | r, inher                   | -0.09                                          | 752        | 34          | 0.05                                | 987.3 ± 3.4              | 6.05 ± 0.3                                         | 0.0713 ± 0.6                                        | 6.05 ± 0.3                                             | 0.0712 ± 0.6                                             | 1.62 ± 0.7                                              | 0.1653 ± 0.3                                            | 0.4726               |
| 1          | r, inher                   | 1.03                                           | 436        | 100         | 0.24                                | 1722 ± 15                | 3.62 ± 0.5                                         | 0.1055 ± 0.8                                        | 3.62 ± 0.5                                             | 0.1054 ± 0.8                                             | 4.02 ± 1.0                                              | 0.2765 ± 0.5                                            | 0.4984               |
| 6          | r, inher                   | 0.05                                           | 360        | 55          | 0.16                                | 1883 ± 10                | 2.95 ± 0.5                                         | 0.1154 ± 0.5                                        | 2.95 ± 0.5                                             | 0.1152 ± 0.6                                             | 5.38 ± 0.7                                              | 0.3384 ± 0.5                                            | 0.6611               |
| 14         | HcPb                       | 7.73                                           | 414        | 70          | 0.17                                | 2363 ± 9                 | 3.96 ± 0.9                                         | 0.1523 ± 0.5                                        | 3.97 ± 0.9                                             | 0.1515 ± 0.5                                             | 5.27 ± 1.0                                              | 0.2521 ± 0.9                                            | 0.8603               |
| 13         | HcPb                       | 10.06                                          | 63         | 27          | 0.44                                | 2375 ± 52                | 3.09 ± 1.2                                         | 0.1881 ± 1.1                                        | 3.23 ± 1.3                                             | 0.1526 ± 3.0                                             | 6.51 ± 3.3                                              | 0.3094 ± 1.3                                            | 0.3983               |
| 2          | r, inher                   | 0.98                                           | 204        | 213         | 1.08                                | 2461 ± 9                 | 2.23 ± 0.6                                         | 0.1607 ± 0.5                                        | 2.23 ± 0.6                                             | 0.1605 ± 0.5                                             | 9.92 ± 0.8                                              | 0.4482 ± 0.6                                            | 0.7547               |
| 19         | HcPb                       | 2.04                                           | 555        | 27          | 0.05                                | 2466 ± 9                 | 2.33 ± 0.4                                         | 0.1610 ± 0.5                                        | 2.33 ± 0.4                                             | 0.1610 ± 0.5                                             | 9.53 ± 0.7                                              | 0.4293 ± 0.4                                            | 0.5829               |
| 15         | r, inher                   | -0.58                                          | 166        | 54          | 0.34                                | 2660 ± 19                | 1.93 ± 0.8                                         | 0.1810 ± 1.1                                        | 1.93 ± 0.8                                             | 0.1807 ± 1.1                                             | 12.93 ± 1.4                                             | 0.5190 ± 0.8                                            | 0.5803               |

<sup>a</sup> Zircon characterization: r=rim; inher=inheritance; HcPb= high common Pb.

<sup>b</sup> Negative values denote reversely discordant analyses.

<sup>c</sup> Pb\* denotes radiogenic lead.

<sup>d</sup> Errors are 1σ (absolute values).

<sup>e</sup> Errors are expressed in percentage (%).

\*Age <1000 Ma are based on 207Pb corrected <sup>206</sup>Pb/<sup>238</sup>U ratios, whereas ages >1000 Ma are calculated from 204Pb corrected <sup>206</sup>Pb/<sup>207</sup>Pb ratios".
