# Supplementary material
Source: publisher figshare collection journal article supplement (https://geolsoc.figshare.com/articles/dataset/_/3453593)
Supplement: Supplementary file 3 [file 1]

**Table D.** U, Th, Hf and trace element (REE) composition of zircon for the lowermost migmatites (samples 349 and 524). Concentrations are given ppm.

| Samples | 524   |       |       |       |       | 349   |       |       |       |       |
|---------|-------|-------|-------|-------|-------|-------|-------|-------|-------|-------|
|         | 5     | 5.2   | 7     | 17    | 18.1  | 4     | 11    | 13    | 20    | 29    |
| U       | 659   | 730   | 689   | 1022  | 414   | 1041  | 1080  | 907   | 247   | 786   |
| Th      | 6.67  | 8.14  | 11.14 | 7.40  | 6.45  | 4.07  | 8.15  | 8.26  | 2.52  | 4.35  |
| Hf      | 10437 | 13796 | 12898 | 14140 | 11291 | 14062 | 13433 | 12102 | 13383 | 11435 |
| La      | 0.317 | 0.010 | 0.028 | 0.021 | 0.092 | 0.014 | 0.004 | 0.907 | 0.013 | 0.582 |
| Ce      | 1.13  | 0.92  | 0.94  | 0.62  | 0.99  | 0.90  | 1.51  | 2.72  | 0.79  | 1.98  |
| Nd      | 0.11  | 0.15  | 0.18  | 0.10  | 0.10  | 0.05  | 0.06  | 0.36  | 0.02  | 0.25  |
| Sm      | 0.42  | 0.60  | 0.66  | 0.51  | 0.57  | 0.33  | 0.54  | 0.48  | 0.27  | 0.45  |
| Eu      | 0.12  | 0.19  | 0.18  | 0.13  | 0.15  | 0.24  | 0.36  | 0.34  | 0.15  | 0.32  |
| Gd      | 7.11  | 11.14 | 10.38 | 8.75  | 8.45  | 6.16  | 8.62  | 6.39  | 4.24  | 5.69  |
| Dy      | 69    | 112   | 105   | 91    | 72    | 71    | 99    | 71    | 52    | 57    |
| Er      | 203   | 280   | 286   | 274   | 140   | 206   | 295   | 202   | 155   | 165   |
| Yb      | 565   | 672   | 724   | 853   | 283   | 651   | 929   | 638   | 507   | 526   |
| Y       | 1011  | 1526  | 1466  | 1292  | 877   | 934   | 1320  | 947   | 704   | 756   |
| Th/U    | 0.010 | 0.011 | 0.016 | 0.007 | 0.016 | 0.004 | 0.008 | 0.009 | 0.010 | 0.006 |
| Yb/Gd   | 79.4  | 60.3  | 69.8  | 97.5  | 33.4  | 105.7 | 107.7 | 99.9  | 119.6 | 92.4  |
| Eu/Eu*  | 0.21  | 0.22  | 0.21  | 0.19  | 0.21  | 0.52  | 0.51  | 0.59  | 0.43  | 0.60  |
| Ce/Sm   | 2.72  | 1.54  | 1.42  | 1.22  | 1.73  | 2.70  | 2.79  | 5.72  | 2.93  | 4.36  |
| U/Ce    | 583   | 791   | 735   | 1642  | 417   | 1161  | 714   | 334   | 313   | 397   |

Eu/Eu\* is normalized to chondrite values.
