# Supplementary material
Source: publisher figshare collection journal article supplement (https://geolsoc.figshare.com/articles/dataset/_/3453593)
Supplement: Supplementary file 4 [file 1]

**Table B.** U-Th-Pb SHRIMP-RG analytical data for zircons from the Sant Llorenç-La Jonquera tonalite (samples 530) and Ceret stock gabbro (sample 420).

| Spot Name  | Description <sup>(a)</sup> | Common<br><sup>206</sup> Pb (%) <sup>(b)</sup> | U<br>(ppm) | Th<br>(ppm) | <sup>207</sup> Pb Corrected         |                                                        |                                                     | Uncorrected ratios                                 |                                                     | <sup>204</sup> Pb Corrected ratios                                 |                                                                     |
|------------|----------------------------|------------------------------------------------|------------|-------------|-------------------------------------|--------------------------------------------------------|-----------------------------------------------------|----------------------------------------------------|-----------------------------------------------------|--------------------------------------------------------------------|---------------------------------------------------------------------|
|            |                            |                                                |            |             | <sup>232</sup> Th/ <sup>238</sup> U | <sup>206</sup> Pb/ <sup>238</sup> U Age <sup>(d)</sup> | <sup>207</sup> Pb/ <sup>206</sup> Pb <sup>(e)</sup> | <sup>238</sup> U/ <sup>206</sup> Pb <sup>(e)</sup> | <sup>207</sup> Pb/ <sup>206</sup> Pb <sup>(e)</sup> | <sup>238</sup> U/ <sup>206</sup> Pb <sup>*(c)</sup> <sup>(e)</sup> | <sup>207</sup> Pb/ <sup>206</sup> Pb <sup>*(c)</sup> <sup>(e)</sup> |
| <b>530</b> |                            |                                                |            |             |                                     |                                                        |                                                     |                                                    |                                                     |                                                                    |                                                                     |
| 1          | r,o                        | 0.18                                           | 501        | 135         | 0.28                                | 314.5 ± 1.8                                            | 19.97 ± 0.6                                         | 0.0541 ± 1.7                                       | 20.00 ± 0.6                                         | 0.0527 ± 2.1                                                       |                                                                     |
| 2          | r,o                        | 0.04                                           | 698        | 242         | 0.36                                | 308.2 ± 1.5                                            | 20.41 ± 0.5                                         | 0.0529 ± 1.5                                       | 20.45 ± 0.5                                         | 0.0515 ± 1.9                                                       |                                                                     |
| 3          | r,o                        | -0.04                                          | 594        | 169         | 0.29                                | 314.6 ± 1.7                                            | 20.00 ± 0.5                                         | 0.0523 ± 1.6                                       | 20.01 ± 0.5                                         | 0.0520 ± 1.7                                                       |                                                                     |
| 4          | r,o                        | 0.02                                           | 663        | 258         | 0.40                                | 311.0 ± 1.7                                            | 20.23 ± 0.5                                         | 0.0528 ± 2.0                                       | 20.26 ± 0.5                                         | 0.0516 ± 2.3                                                       |                                                                     |
| 5          | r,o                        | 0.01                                           | 639        | 191         | 0.31                                | 299.8 ± 1.6                                            | 21.00 ± 0.5                                         | 0.0524 ± 1.6                                       | 21.01 ± 0.5                                         | 0.0521 ± 1.6                                                       |                                                                     |
| 6          | c,s                        | 0.13                                           | 607        | 236         | 0.40                                | 303.5 ± 1.6                                            | 20.72 ± 0.5                                         | 0.0535 ± 1.6                                       | 20.74 ± 0.5                                         | 0.0527 ± 2.0                                                       |                                                                     |
| 7          | r,o                        | 0.13                                           | 570        | 149         | 0.27                                | 309.6 ± 1.7                                            | 20.30 ± 0.6                                         | 0.0536 ± 1.6                                       | 20.33 ± 0.6                                         | 0.0525 ± 2.0                                                       |                                                                     |
| 8          | r,o                        | 0.00                                           | 879        | 313         | 0.37                                | 309.3 ± 1.4                                            | 20.35 ± 0.4                                         | 0.0525 ± 1.6                                       | 20.37 ± 0.4                                         | 0.0517 ± 1.8                                                       |                                                                     |
| 9          | r,o                        | 0.11                                           | 496        | 156         | 0.33                                | 304.7 ± 1.8                                            | 20.64 ± 0.6                                         | 0.0533 ± 1.7                                       | 20.65 ± 0.6                                         | 0.0529 ± 1.8                                                       |                                                                     |
| 10         | c,s                        | 0.05                                           | 1131       | 1058        | 0.97                                | 313.5 ± 1.2                                            | 20.05 ± 0.4                                         | 0.0530 ± 1.2                                       | 20.06 ± 0.4                                         | 0.0527 ± 1.3                                                       |                                                                     |
| 11         | c,s                        | 0.53                                           | 478        | 353         | 0.76                                | 314.4 ± 2.1                                            | 19.90 ± 0.7                                         | 0.0569 ± 1.7                                       | 20.00 ± 0.7                                         | 0.0527 ± 3.4                                                       |                                                                     |
| 12         | r,o                        | -0.01                                          | 707        | 254         | 0.37                                | 308.0 ± 1.5                                            | 20.44 ± 0.5                                         | 0.0524 ± 1.4                                       | 20.44 ± 0.5                                         | 0.0524 ± 1.4                                                       |                                                                     |
| 13         | c,s                        | -0.19                                          | 274        | 73          | 0.27                                | 299.9 ± 2.4                                            | 21.04 ± 0.8                                         | 0.0508 ± 2.4                                       | 21.06 ± 0.8                                         | 0.0500 ± 2.6                                                       |                                                                     |
| 14         | r,o                        | -0.02                                          | 462        | 128         | 0.29                                | 310.7 ± 1.9                                            | 20.26 ± 0.6                                         | 0.0524 ± 1.8                                       | 20.28 ± 0.6                                         | 0.0517 ± 2.2                                                       |                                                                     |
| 15         | r,o                        | 0.16                                           | 587        | 183         | 0.32                                | 293.0 ± 1.7                                            | 21.47 ± 0.6                                         | 0.0535 ± 1.7                                       | 21.48 ± 0.6                                         | 0.0530 ± 1.8                                                       |                                                                     |
| 16         | r,o                        | -0.15                                          | 660        | 195         | 0.30                                | 311.8 ± 1.6                                            | 20.21 ± 0.5                                         | 0.0514 ± 1.5                                       | 20.23 ± 0.5                                         | 0.0506 ± 1.7                                                       |                                                                     |
| 17         | c,s                        | -0.05                                          | 353        | 93          | 0.27                                | 303.7 ± 2.0                                            | 20.74 ± 0.7                                         | 0.0520 ± 2.0                                       | 20.78 ± 0.7                                         | 0.0507 ± 2.4                                                       |                                                                     |
| 18         | r,o                        | 0.06                                           | 846        | 282         | 0.34                                | 308.4 ± 1.4                                            | 20.40 ± 0.4                                         | 0.0530 ± 1.3                                       | 20.42 ± 0.5                                         | 0.0522 ± 1.6                                                       |                                                                     |
| 19         | r,o                        | -0.18                                          | 565        | 172         | 0.31                                | 312.3 ± 1.7                                            | 20.18 ± 0.5                                         | 0.0512 ± 1.6                                       | 20.19 ± 0.5                                         | 0.0506 ± 1.8                                                       |                                                                     |
| 20         | c,h                        | -0.04                                          | 538        | 203         | 0.39                                | 312.1 ± 1.7                                            | 20.17 ± 0.6                                         | 0.0523 ± 1.7                                       | 20.18 ± 0.6                                         | 0.0516 ± 1.8                                                       |                                                                     |
| 21         | c,s                        | -0.04                                          | 370        | 76          | 0.21                                | 314.7 ± 2.1                                            | 20.00 ± 0.7                                         | 0.0524 ± 2.0                                       | 20.00 ± 0.7                                         | 0.0524 ± 2.0                                                       |                                                                     |
| 21.2       | r,o                        | -0.12                                          | 442        | 120         | 0.28                                | 311.9 ± 2.1                                            | 20.20 ± 0.7                                         | 0.0516 ± 2.0                                       | 20.15 ± 0.7                                         | 0.0533 ± 2.6                                                       |                                                                     |
| 22         | r,o                        | -0.09                                          | 520        | 138         | 0.27                                | 305.5 ± 1.7                                            | 20.62 ± 0.6                                         | 0.0518 ± 1.7                                       | 20.63 ± 0.6                                         | 0.0514 ± 1.7                                                       |                                                                     |
| 23         | r,o                        | 0.00                                           | 778        | 320         | 0.43                                | 310.6 ± 1.4                                            | 20.26 ± 0.5                                         | 0.0526 ± 1.4                                       | 20.29 ± 0.5                                         | 0.0512 ± 1.9                                                       |                                                                     |
| 24         | c,h                        | -0.09                                          | 313        | 204         | 0.67                                | 311.5 ± 2.3                                            | 20.21 ± 0.7                                         | 0.0519 ± 2.2                                       | 20.25 ± 0.7                                         | 0.0504 ± 2.7                                                       |                                                                     |
| 25         | c,s                        | -0.23                                          | 294        | 68          | 0.24                                | 310.3 ± 2.3                                            | 20.33 ± 0.7                                         | 0.0507 ± 2.3                                       | 20.33 ± 0.7                                         | 0.0507 ± 2.3                                                       |                                                                     |
| 26         | r,o                        | 0.00                                           | 645        | 246         | 0.39                                | 307.5 ± 1.5                                            | 20.46 ± 0.5                                         | 0.0525 ± 1.5                                       | 20.46 ± 0.5                                         | 0.0525 ± 1.5                                                       |                                                                     |
| 27         | c,h                        | 0.02                                           | 302        | 215         | 0.73                                | 305.4 ± 2.3                                            | 20.61 ± 0.7                                         | 0.0526 ± 2.2                                       | 20.61 ± 0.7                                         | 0.0526 ± 2.2                                                       |                                                                     |
| 28         | c,h                        | -0.06                                          | 421        | 144         | 0.35                                | 309.5 ± 1.9                                            | 20.34 ± 0.6                                         | 0.0521 ± 1.8                                       | 20.38 ± 0.6                                         | 0.0507 ± 2.2                                                       |                                                                     |
| 29         | r,o-s                      | 0.00                                           | 879        | 320         | 0.38                                | 311.3 ± 1.3                                            | 20.21 ± 0.4                                         | 0.0526 ± 1.3                                       | 20.23 ± 0.4                                         | 0.0520 ± 1.4                                                       |                                                                     |
| 30         | r,o-s                      | 0.09                                           | 542        | 134         | 0.26                                | 301.6 ± 1.7                                            | 20.86 ± 0.5                                         | 0.0531 ± 1.6                                       | 20.90 ± 0.6                                         | 0.0517 ± 2.0                                                       |                                                                     |
| <b>420</b> |                            |                                                |            |             |                                     |                                                        |                                                     |                                                    |                                                     |                                                                    |                                                                     |
| 1          | o                          | 0.16                                           | 568        | 233         | 0.42                                | 303.4 ± 1.6                                            | 20.72 ± 0.5                                         | 0.0537 ± 1.9                                       | 20.73 ± 0.5                                         | 0.0530 ± 2.0                                                       |                                                                     |
| 2          | o-s                        | 0.06                                           | 731        | 344         | 0.49                                | 307.2 ± 1.4                                            | 20.48 ± 0.5                                         | 0.0530 ± 1.4                                       | 20.50 ± 0.5                                         | 0.0520 ± 1.6                                                       |                                                                     |
| 2.2        | r                          | 0.42                                           | 50         | 18          | 0.37                                | 293.8 ± 4.8                                            | 21.35 ± 1.6                                         | 0.0556 ± 5.1                                       | 21.35 ± 1.6                                         | 0.0556 ± 5.1                                                       |                                                                     |
| 3          | r                          | -0.10                                          | 68         | 23          | 0.35                                | 301.5 ± 4.2                                            | 20.90 ± 1.4                                         | 0.0516 ± 4.5                                       | 20.98 ± 1.4                                         | 0.0488 ± 6.0                                                       |                                                                     |
| 4          | o                          | 0.15                                           | 583        | 190         | 0.34                                | 307.7 ± 1.6                                            | 20.43 ± 0.5                                         | 0.0537 ± 1.5                                       | 20.40 ± 0.5                                         | 0.0548 ± 1.9                                                       |                                                                     |
| 4.2        | r                          | 0.75                                           | 48         | 14          | 0.30                                | 309.6 ± 5.6                                            | 20.17 ± 1.8                                         | 0.0586 ± 5.0                                       | 20.82 ± 2.2                                         | 0.0332 ± 33.5                                                      |                                                                     |
| 5          | o                          | -0.07                                          | 673        | 286         | 0.44                                | 306.9 ± 1.5                                            | 20.52 ± 0.5                                         | 0.0519 ± 1.4                                       | 20.53 ± 0.5                                         | 0.0516 ± 1.5                                                       |                                                                     |
| 6          | o-s                        | -0.02                                          | 942        | 637         | 0.70                                | 312.4 ± 1.3                                            | 20.14 ± 0.4                                         | 0.0524 ± 1.2                                       | 20.12 ± 0.4                                         | 0.0533 ± 1.4                                                       |                                                                     |
| 7          | o                          | 0.02                                           | 612        | 257         | 0.43                                | 308.5 ± 1.6                                            | 20.39 ± 0.5                                         | 0.0527 ± 1.5                                       | 20.41 ± 0.5                                         | 0.0520 ± 1.6                                                       |                                                                     |
| 7.2        | r                          | 0.40                                           | 63         | 21          | 0.35                                | 298.6 ± 4.4                                            | 21.01 ± 1.5                                         | 0.0555 ± 4.5                                       | 21.01 ± 1.5                                         | 0.0555 ± 4.5                                                       |                                                                     |
| 8          | r                          | 0.48                                           | 62         | 23          | 0.39                                | 301.3 ± 4.3                                            | 20.80 ± 1.4                                         | 0.0562 ± 4.4                                       | 21.07 ± 1.5                                         | 0.0459 ± 11.6                                                      |                                                                     |
| 9          | r                          | -0.28                                          | 67         | 22          | 0.34                                | 307.5 ± 4.2                                            | 20.53 ± 1.4                                         | 0.0503 ± 4.4                                       | 20.53 ± 1.4                                         | 0.0503 ± 4.4                                                       |                                                                     |
| 9.2        | c,o                        | 0.08                                           | 376        | 91          | 0.25                                | 312.1 ± 1.9                                            | 20.14 ± 0.6                                         | 0.0533 ± 1.9                                       | 20.15 ± 0.6                                         | 0.0528 ± 2.0                                                       |                                                                     |
| 10         | r                          | 0.13                                           | 70         | 26          | 0.39                                | 306.6 ± 4.3                                            | 20.51 ± 1.4                                         | 0.0535 ± 4.4                                       | 20.51 ± 1.4                                         | 0.0535 ± 4.4                                                       |                                                                     |
| 11         | r                          | 0.85                                           | 56         | 20          | 0.37                                | 306.2 ± 4.7                                            | 20.38 ± 1.5                                         | 0.0593 ± 4.6                                       | 20.38 ± 1.5                                         | 0.0593 ± 4.6                                                       |                                                                     |
| 12         | o                          | 0.58                                           | 513        | 153         | 0.31                                | 300.3 ± 1.7                                            | 20.85 ± 0.6                                         | 0.0570 ± 1.6                                       | 20.97 ± 0.6                                         | 0.0524 ± 3.0                                                       |                                                                     |
| 13         | o-s                        | -0.01                                          | 216        | 152         | 0.73                                | 307.6 ± 2.6                                            | 20.46 ± 0.8                                         | 0.0524 ± 2.5                                       | 20.48 ± 0.8                                         | 0.0515 ± 2.8                                                       |                                                                     |
| 14         | o-s,c                      | -0.12                                          | 143        | 85          | 0.62                                | 303.6 ± 3.1                                            | 20.76 ± 1.0                                         | 0.0515 ± 3.1                                       | 20.80 ± 1.0                                         | 0.0501 ± 3.7                                                       |                                                                     |
| 14.2       | r                          | -0.04                                          | 54         | 20          | 0.38                                | 300.8 ± 4.7                                            | 20.94 ± 1.5                                         | 0.0520 ± 5.0                                       | 21.10 ± 1.6                                         | 0.0461 ± 8.6                                                       |                                                                     |
| 15         | r                          | 0.15                                           | 79         | 26          | 0.34                                | 306.1 ± 4.0                                            | 20.53 ± 1.3                                         | 0.0537 ± 4.1                                       | 20.62 ± 1.3                                         | 0.0503 ± 6.5                                                       |                                                                     |
| 16         | r                          | 0.00                                           | 526        | 360         | 0.71                                | 314.6 ± 1.8                                            | 19.99 ± 0.6                                         | 0.0527 ± 1.7                                       | 20.04 ± 0.6                                         | 0.0509 ± 2.3                                                       |                                                                     |
| 17         | c,o-s                      | -0.01                                          | 377        | 119         | 0.33                                | 308.0 ± 2.0                                            | 20.44 ± 0.7                                         | 0.0524 ± 2.0                                       | 20.47 ± 0.7                                         | 0.0510 ± 2.5                                                       |                                                                     |
| 18         | c,s                        | 0.05                                           | 335        | 188         | 0.58                                | 310.8 ± 2.2                                            | 20.23 ± 0.7                                         | 0.0530 ± 2.0                                       | 20.25 ± 0.7                                         | 0.0524 ± 2.2                                                       |                                                                     |
| 19         | c,s                        | 0.99                                           | 493        | 143         | 0.30                                | 311.8 ± 1.8                                            | 19.98 ± 0.6                                         | 0.0605 ± 1.5                                       | 20.16 ± 0.6                                         | 0.0536 ± 4.3                                                       |                                                                     |

<sup>a</sup> Zircon characterization: o=oscillatory zoning; c=core; r=rim; h=homogeneous; s=sector zoning.

<sup>b</sup> Negative values denote reversely discordant analyses.

<sup>c</sup> Pb\* denotes radiogenic lead.

<sup>d</sup> Errors are 1σ (absolute values).

<sup>e</sup> Errors are expressed in percentage (%).
