# Supplementary material
Source: publisher figshare collection journal article supplement (https://geolsoc.figshare.com/articles/dataset/_/3453593)
Supplement: Supplementary file 5 [file 1]

**Table E.** U, Th, Hf and trace element (REE) composition of zircon for the Sant Llorenç–La Jonquera tonalite (samples 530) and the Ceret stock gabbro (samples 420). Concentrations are given ppm.

| Spot number | U    | Th   | Hf    | La    | Ce    | Nd   | Sm    | Eu   | Gd    | Dy    | Er  | Yb   | Y    | Th/U | Yb/Gd | Ce/Sm | Eu/Eu* | U/Ce |
|-------------|------|------|-------|-------|-------|------|-------|------|-------|-------|-----|------|------|------|-------|-------|--------|------|
| <b>530</b>  |      |      |       |       |       |      |       |      |       |       |     |      |      |      |       |       |        |      |
| 1           | 518  | 147  | 11838 | 0.368 | 7.10  | 0.61 | 0.90  | 0.12 | 10.7  | 57.9  | 137 | 320  | 730  | 0.28 | 29.9  | 7.87  | 0.12   | 73   |
| 2           | 712  | 264  | 11348 | 0.012 | 8.17  | 0.37 | 1.24  | 0.13 | 13.3  | 70.7  | 154 | 325  | 855  | 0.37 | 24.5  | 6.61  | 0.10   | 87   |
| 3           | 610  | 184  | 12001 | 0.013 | 7.64  | 0.27 | 1.03  | 0.13 | 11.5  | 61.4  | 140 | 307  | 764  | 0.30 | 26.6  | 7.39  | 0.12   | 80   |
| 4           | 687  | 283  | 12784 | 0.006 | 12.50 | 0.42 | 1.37  | 0.15 | 15.3  | 78.6  | 171 | 347  | 931  | 0.41 | 22.8  | 9.11  | 0.10   | 55   |
| 5           | 658  | 209  | 11531 | 0.084 | 9.31  | 0.61 | 1.23  | 0.87 | 12.4  | 69.3  | 162 | 363  | 864  | 0.32 | 29.3  | 7.57  | 0.68   | 71   |
| 6           | 618  | 257  | 13019 | 0.113 | 12.65 | 0.56 | 1.83  | 0.11 | 19.5  | 96.6  | 201 | 380  | 1145 | 0.42 | 19.5  | 6.93  | 0.05   | 49   |
| 7           | 600  | 165  | 14020 | 0.017 | 6.48  | 0.27 | 0.83  | 0.09 | 9.2   | 49.4  | 118 | 275  | 620  | 0.28 | 29.9  | 7.82  | 0.10   | 93   |
| 8           | 899  | 342  | 11468 | 0.017 | 8.71  | 0.36 | 1.33  | 0.16 | 15.0  | 78.1  | 178 | 381  | 964  | 0.38 | 25.4  | 6.55  | 0.11   | 103  |
| 9           | 505  | 170  | 10993 | 0.013 | 9.42  | 0.35 | 1.15  | 0.15 | 13.5  | 73.5  | 163 | 347  | 887  | 0.34 | 25.7  | 8.20  | 0.12   | 54   |
| 10          | 1176 | 1174 | 10992 | 0.169 | 79.61 | 9.95 | 21.94 | 0.55 | 166.7 | 512.7 | 740 | 1065 | 4451 | 1.00 | 6.4   | 3.63  | 0.03   | 15   |
| 11          | 511  | 380  | 12150 | 0.709 | 16.41 | 2.59 | 3.93  | 0.50 | 31.6  | 120.7 | 217 | 408  | 1245 | 0.74 | 12.9  | 4.17  | 0.14   | 31   |
| 12          | 726  | 278  | 11857 | 0.015 | 8.89  | 0.39 | 1.02  | 0.12 | 11.4  | 62.9  | 139 | 303  | 756  | 0.38 | 26.6  | 8.68  | 0.11   | 82   |
| 13          | 285  | 80   | 12637 | 0.011 | 5.46  | 0.09 | 0.55  | 0.06 | 6.3   | 37.9  | 86  | 193  | 450  | 0.28 | 30.5  | 9.88  | 0.10   | 52   |
| 14          | 481  | 140  | 12110 | 0.009 | 6.62  | 0.26 | 0.91  | 0.11 | 10.8  | 60.3  | 142 | 333  | 763  | 0.29 | 30.8  | 7.30  | 0.11   | 73   |
| 15          | 603  | 200  | 12098 | 0.006 | 7.85  | 0.30 | 0.91  | 0.11 | 11.0  | 55.2  | 128 | 282  | 688  | 0.33 | 25.5  | 8.63  | 0.11   | 77   |
| 16          | 689  | 216  | 12199 | 0.015 | 7.85  | 0.29 | 1.09  | 0.15 | 12.4  | 68.9  | 164 | 373  | 878  | 0.31 | 30.2  | 7.23  | 0.13   | 88   |
| 17          | 361  | 101  | 12089 | 0.024 | 5.29  | 0.21 | 0.60  | 0.10 | 8.1   | 47.5  | 114 | 252  | 605  | 0.28 | 31.1  | 8.88  | 0.14   | 68   |
| 18          | 868  | 308  | 12414 | 0.102 | 9.67  | 0.41 | 1.33  | 0.20 | 15.2  | 80.0  | 181 | 387  | 985  | 0.36 | 25.5  | 7.25  | 0.13   | 90   |
| 19          | 585  | 188  | 12164 | 0.012 | 9.05  | 0.33 | 1.16  | 0.14 | 15.0  | 81.3  | 190 | 412  | 1021 | 0.32 | 27.5  | 7.78  | 0.10   | 65   |
| 20          | 553  | 225  | 12231 | 0.008 | 9.61  | 0.55 | 2.06  | 0.25 | 22.3  | 107.4 | 222 | 448  | 1267 | 0.41 | 20.1  | 4.67  | 0.11   | 57   |
| 21          | 386  | 85   | 14200 | 0.013 | 4.06  | 0.92 | 3.34  | 0.15 | 38.0  | 183.7 | 340 | 562  | 1958 | 0.22 | 14.8  | 1.21  | 0.04   | 95   |
| 21.2        | 458  | 131  | 12363 | 0.008 | 5.81  | 0.16 | 0.63  | 0.08 | 7.4   | 42.5  | 105 | 241  | 554  | 0.29 | 32.8  | 9.29  | 0.11   | 79   |
| 22          | 538  | 152  | 12525 | 0.006 | 7.22  | 0.19 | 0.70  | 0.10 | 8.3   | 45.9  | 109 | 247  | 581  | 0.28 | 29.8  | 10.33 | 0.13   | 75   |
| 23          | 803  | 350  | 12224 | 0.011 | 10.26 | 0.39 | 1.35  | 0.16 | 15.3  | 77.1  | 165 | 341  | 907  | 0.44 | 22.3  | 7.60  | 0.10   | 78   |
| 24          | 323  | 225  | 9869  | 0.017 | 14.48 | 2.70 | 5.89  | 0.88 | 44.7  | 159.6 | 278 | 453  | 1601 | 0.70 | 10.1  | 2.46  | 0.16   | 22   |
| 25          | 302  | 74   | 12664 | 0.012 | 4.68  | 0.12 | 0.35  | 0.06 | 5.0   | 28.0  | 71  | 172  | 376  | 0.25 | 34.4  | 13.26 | 0.14   | 65   |
| 26          | 665  | 269  | 11537 | 0.021 | 12.51 | 0.49 | 1.68  | 0.19 | 19.8  | 105.2 | 228 | 458  | 1207 | 0.40 | 23.2  | 7.43  | 0.10   | 53   |
| 27          | 308  | 232  | 9301  | 0.036 | 15.76 | 4.23 | 8.20  | 1.19 | 67.4  | 229.8 | 361 | 539  | 2095 | 0.75 | 8.0   | 1.92  | 0.15   | 20   |
| 28          | 441  | 159  | 12581 | 0.048 | 10.15 | 0.31 | 1.05  | 0.10 | 11.2  | 63.6  | 140 | 300  | 766  | 0.36 | 26.8  | 9.65  | 0.09   | 43   |
| 29          | 914  | 351  | 12415 | 0.005 | 9.73  | 0.35 | 1.27  | 0.16 | 14.2  | 75.2  | 168 | 360  | 917  | 0.38 | 25.3  | 7.65  | 0.12   | 94   |
| 30          | 560  | 147  | 12231 | 0.008 | 5.87  | 0.20 | 0.79  | 0.12 | 9.3   | 54.1  | 125 | 281  | 668  | 0.26 | 30.2  | 7.40  | 0.13   | 95   |
| <b>420</b>  |      |      |       |       |       |      |       |      |       |       |     |      |      |      |       |       |        |      |
| 1           | 587  | 256  | 10397 | 0.016 | 11.81 | 1.25 | 3.99  | 0.62 | 43.0  | 185.2 | 328 | 536  | 1814 | 0.44 | 12.5  | 2.96  | 0.14   | 50   |
| 2           | 761  | 380  | 11019 | 0.011 | 11.38 | 0.87 | 2.70  | 0.45 | 32.0  | 152.1 | 276 | 441  | 1530 | 0.50 | 13.8  | 4.22  | 0.15   | 67   |
| 2.2         | 52   | 20   | 8273  | 0.023 | 1.90  | 0.24 | 0.66  | 0.11 | 6.0   | 26.7  | 49  | 88   | 271  | 0.38 | 14.6  | 2.86  | 0.17   | 27   |
| 3           | 71   | 25   | 9093  | 0.015 | 2.37  | 0.21 | 0.53  | 0.10 | 5.3   | 26.7  | 52  | 95   | 278  | 0.36 | 17.9  | 4.50  | 0.19   | 30   |
| 5           | 695  | 314  | 10815 | 0.018 | 12.17 | 1.51 | 4.69  | 0.77 | 50.7  | 224.5 | 386 | 614  | 2157 | 0.45 | 12.1  | 2.59  | 0.15   | 57   |
| 6           | 982  | 702  | 9820  | 0.009 | 20.81 | 1.43 | 4.27  | 0.76 | 43.6  | 195.3 | 329 | 506  | 1853 | 0.71 | 11.6  | 4.87  | 0.17   | 47   |
| 7           | 634  | 282  | 11032 | 0.013 | 13.94 | 0.91 | 3.25  | 0.54 | 37.3  | 176.5 | 308 | 500  | 1716 | 0.45 | 13.4  | 4.28  | 0.15   | 45   |
| 7.2         | 65   | 23   | 8927  | 0.007 | 2.34  | 0.19 | 0.58  | 0.12 | 5.9   | 25.9  | 49  | 90   | 266  | 0.36 | 15.3  | 4.06  | 0.19   | 28   |
| 8           | 64   | 26   | 8534  | 0.008 | 2.37  | 0.30 | 0.99  | 0.18 | 9.2   | 39.5  | 74  | 133  | 396  | 0.40 | 14.5  | 2.41  | 0.19   | 27   |
| 9           | 69   | 24   | 9246  | 0.012 | 2.53  | 0.21 | 0.69  | 0.13 | 6.9   | 30.9  | 60  | 112  | 321  | 0.34 | 16.2  | 3.67  | 0.18   | 27   |
| 9.2         | 387  | 99   | 10770 | 0.010 | 4.75  | 0.34 | 1.59  | 0.32 | 20.9  | 105.7 | 211 | 370  | 1130 | 0.26 | 17.7  | 2.99  | 0.17   | 82   |
| 10          | 73   | 29   | 9460  | 0.013 | 2.72  | 0.34 | 1.11  | 0.23 | 10.3  | 39.9  | 71  | 124  | 372  | 0.40 | 12.1  | 2.44  | 0.21   | 27   |
| 11          | 58   | 22   | 8717  | 0.013 | 2.27  | 0.25 | 0.71  | 0.13 | 6.7   | 30.4  | 55  | 101  | 300  | 0.38 | 15.0  | 3.19  | 0.19   | 26   |
| 12          | 534  | 168  | 10533 | 0.019 | 6.96  | 0.69 | 2.57  | 0.46 | 29.9  | 150.6 | 281 | 483  | 1499 | 0.32 | 16.1  | 2.71  | 0.16   | 77   |
| 13          | 224  | 166  | 8272  | 0.020 | 13.51 | 1.99 | 3.72  | 0.44 | 26.7  | 86.8  | 143 | 232  | 805  | 0.74 | 8.7   | 3.63  | 0.13   | 17   |
| 14          | 146  | 93   | 7851  | 0.727 | 12.16 | 1.92 | 3.27  | 0.42 | 25.2  | 82.9  | 142 | 237  | 814  | 0.64 | 9.4   | 3.71  | 0.14   | 12   |
| 14.2        | 56   | 22   | 8215  | 0.012 | 2.14  | 0.28 | 0.67  | 0.17 | 7.5   | 29.6  | 55  | 94   | 294  | 0.40 | 12.6  | 3.18  | 0.22   | 26   |
| 15          | 81   | 28   | 9427  | 0.006 | 2.95  | 0.18 | 0.58  | 0.11 | 6.6   | 28.1  | 54  | 99   | 297  | 0.35 | 15.0  | 5.08  | 0.18   | 27   |
| 16          | 537  | 394  | 9496  | 0.019 | 17.60 | 1.67 | 4.60  | 0.69 | 43.8  | 171.7 | 290 | 451  | 1657 | 0.73 | 10.3  | 3.83  | 0.15   | 31   |
| 17          | 386  | 131  | 9928  | 0.039 | 6.29  | 0.54 | 2.07  | 0.33 | 23.6  | 117.8 | 223 | 391  | 1223 | 0.34 | 16.6  | 3.05  | 0.14   | 61   |
| 18          | 351  | 209  | 9546  | 0.046 | 11.02 | 2.81 | 6.61  | 1.01 | 56.2  | 190.5 | 308 | 482  | 1801 | 0.60 | 8.6   | 1.67  | 0.16   | 32   |
| 19          | 508  | 156  | 10507 | 0.010 | 6.36  | 0.51 | 2.12  | 0.38 | 26.8  | 136.9 | 266 | 464  | 1456 | 0.31 | 17.3  | 3.01  | 0.15   | 80   |

Eu/Eu\* is normalized to chondrite values.
